# Supplementary material
Source: Springer Nature journal article supplement (https://www.springermedizin.de/resource/supplementary/12875_2005_124_MOESM2_ESM.pdf/9436338)

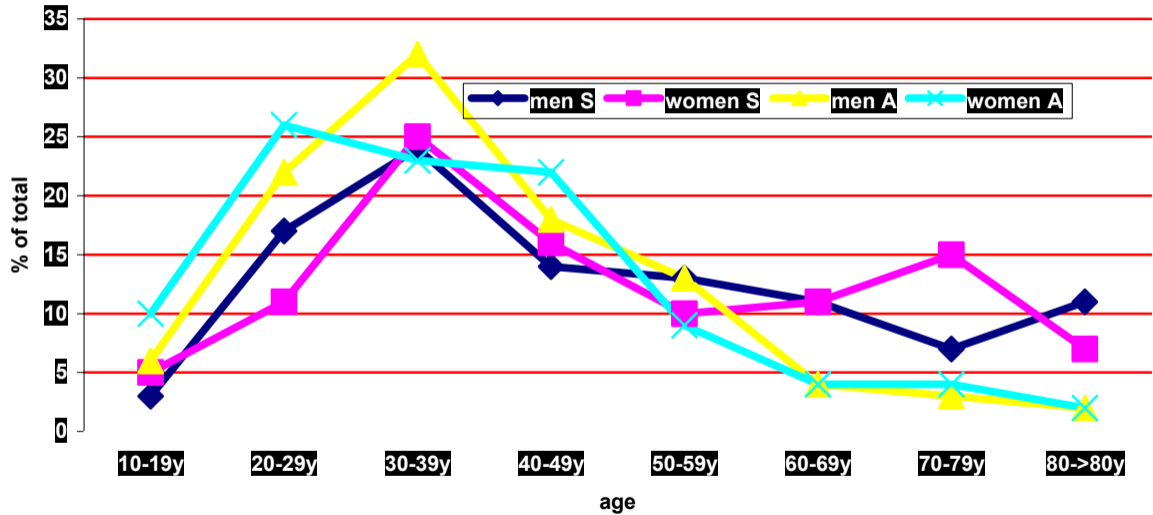

Supplement: MOESM2 [file 9436338]
